# Supplementary material for: Continuous heterogeneous isomerization of 3/4-methyltetrahydrophthalic anhydride (3/4-MTHPA) with acid- and base-modified γ-Al2O3 catalysts
Source: Royal Society of Chemistry journal article supplement (doi:10.1039/d2nj05002a), 2022-12-02
Supplement: d2nj05002a1.pdf [file d2nj05002a1.pdf]

## **Continuous Heterogeneous Isomerization of 3/4-Methyltetrahydrophthalic Anhydride (3/4-MTHPA) with Acid and Base Modified $\gamma$ -Al<sub>2</sub>O<sub>3</sub> catalysts**

*Lei Yin<sup>1</sup>, HuiYang Li<sup>2</sup>, Tingting Ge<sup>1</sup>, Yuchao Li<sup>1</sup>, Cuncun Zuo<sup>1,\*</sup>, Ming Wang<sup>1</sup>,  
GuangJun Cui<sup>2,\*</sup>, Haofei Huang<sup>1,\*</sup>, Lin Guo<sup>3</sup>*

The article will first be published in the New Journal of Chemistry.

### **Electronic Supplemental Information**

KOH, CH<sub>3</sub>COOK and KHCO<sub>3</sub> salts were subjected to TG tests. SI Fig 1 shows that KOH, CH<sub>3</sub>COOK and KHCO<sub>3</sub> have significant weight loss below 200°C, owing to the removal of crystal water in the salt. The catalyst decomposes into KOx at temperatures above 200°C, resulting in secondary weight loss. The weight tends to plateau around 600°C.

SI Fig 2 shows that weight loss occurs below 200°C, owing primarily to the removal of crystal water in the catalyst. In the test of 10%-K/Al<sub>2</sub>O<sub>3</sub> and 7%-P/Al<sub>2</sub>O<sub>3</sub> catalysts, there is no obvious weight loss phenomenon. Other catalysts, on the other hand, have two weight loss processes. The residual salt on the catalyst surface decomposes at temperatures above 200°C, resulting in secondary weight loss. Because of the increased loading, the calcined catalyst still contained volatiles, most likely because CH<sub>3</sub>COOK and NH<sub>4</sub>H<sub>2</sub>PO<sub>4</sub> were not completely decomposed during the catalyst preparation process. The results show that the prepared catalyst's lattice is in a stable state. The addition of K and P can result in the formation of a large number of basic and acidic sites on the catalyst surface, increasing the activity of the catalyst.

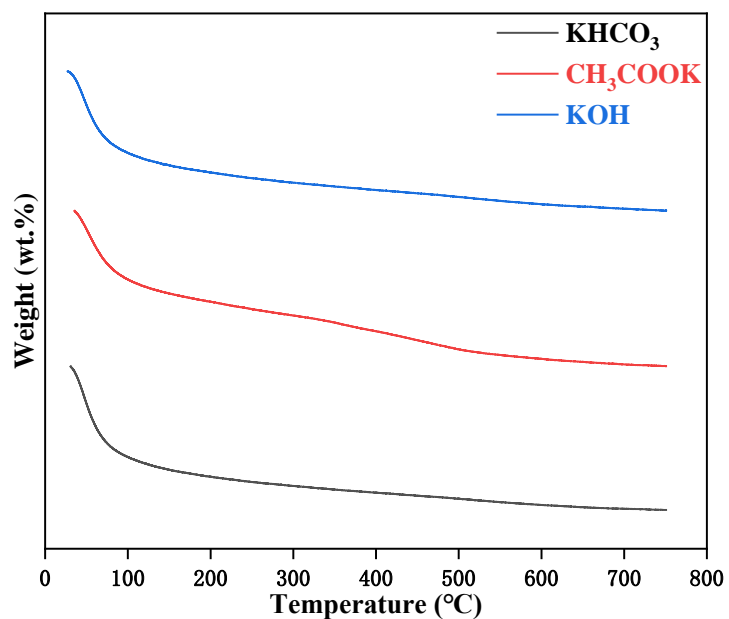

Fig 1. TG curve of the catalyst:  $\text{KOH}$ ,  $\text{CH}_3\text{COOK}$ ,  $\text{KHCO}_3$ .

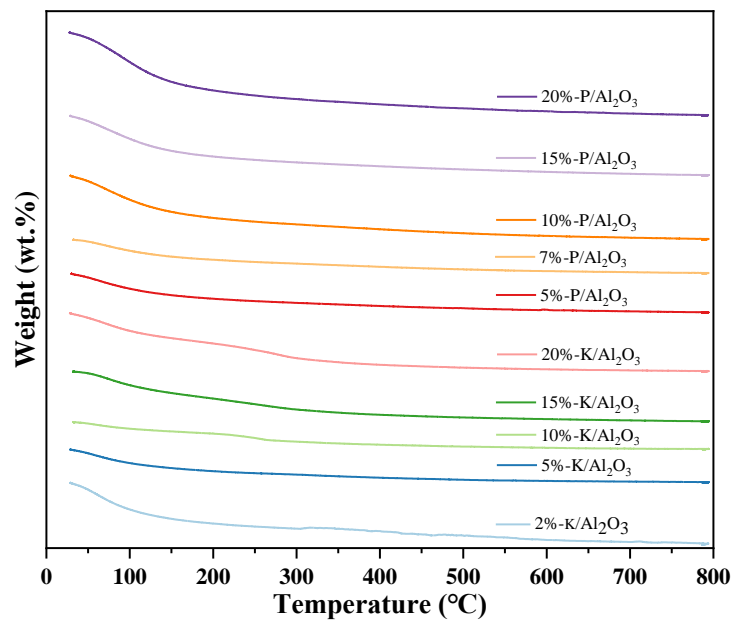

Fig 2. TG curve of the catalyst: a. X%- $\text{K}/\text{Al}_2\text{O}_3$  (X= 2, 5, 10, 15 and 20). b. X%- $\text{P}/\text{Al}_2\text{O}_3$  (X= 5, 7, 10, 15 and 20).

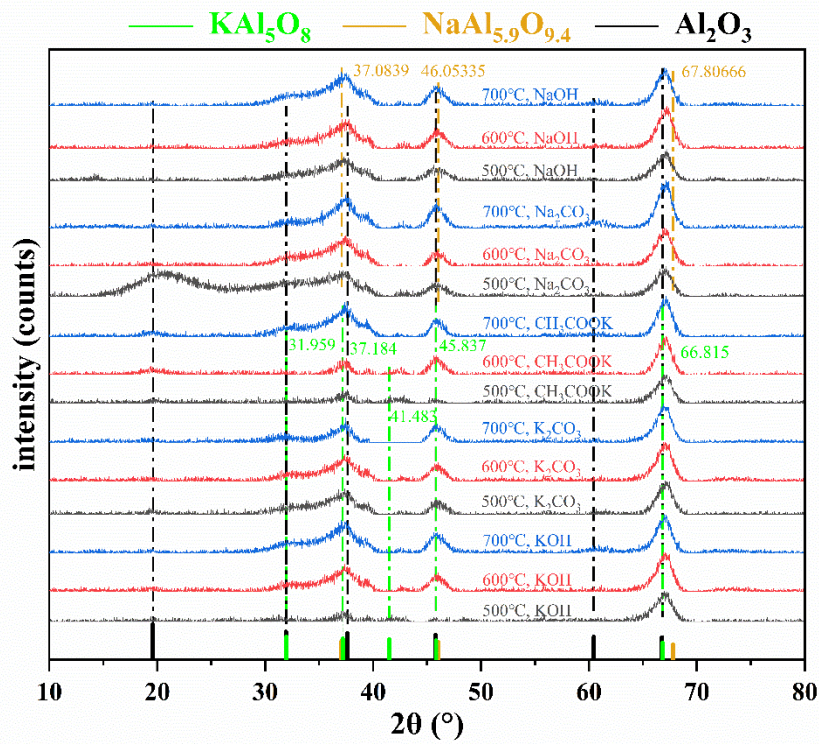

Fig 3. XRD patterns of 500 °C, 600 °C and 700 °C 2%-M/Al<sub>2</sub>O<sub>3</sub> (M= CH<sub>3</sub>COOK, K<sub>2</sub>CO<sub>3</sub>, KOH, NaOH and Na<sub>2</sub>CO<sub>3</sub>, the load of M was 2%).

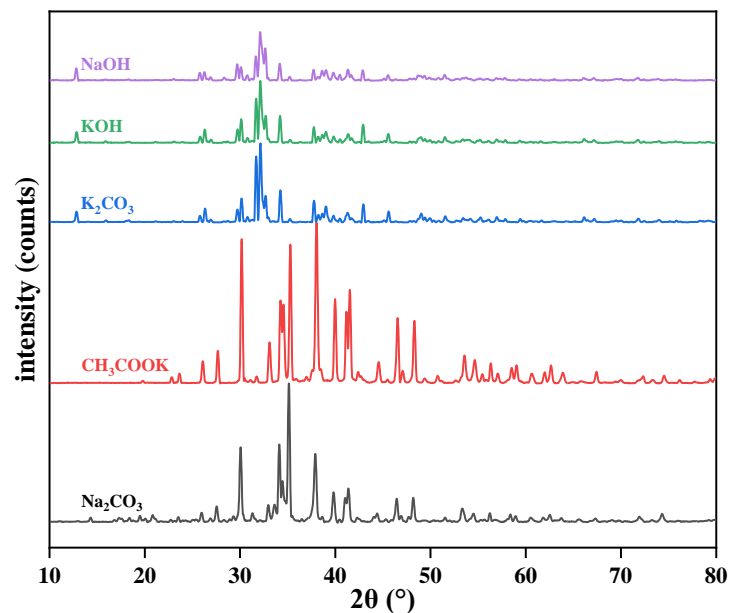

Fig 4. XRD patterns of 2%-M/Al<sub>2</sub>O<sub>3</sub> (M= CH<sub>3</sub>COOK, K<sub>2</sub>CO<sub>3</sub>, KOH, NaOH and Na<sub>2</sub>CO<sub>3</sub>, the load of M was 2%).

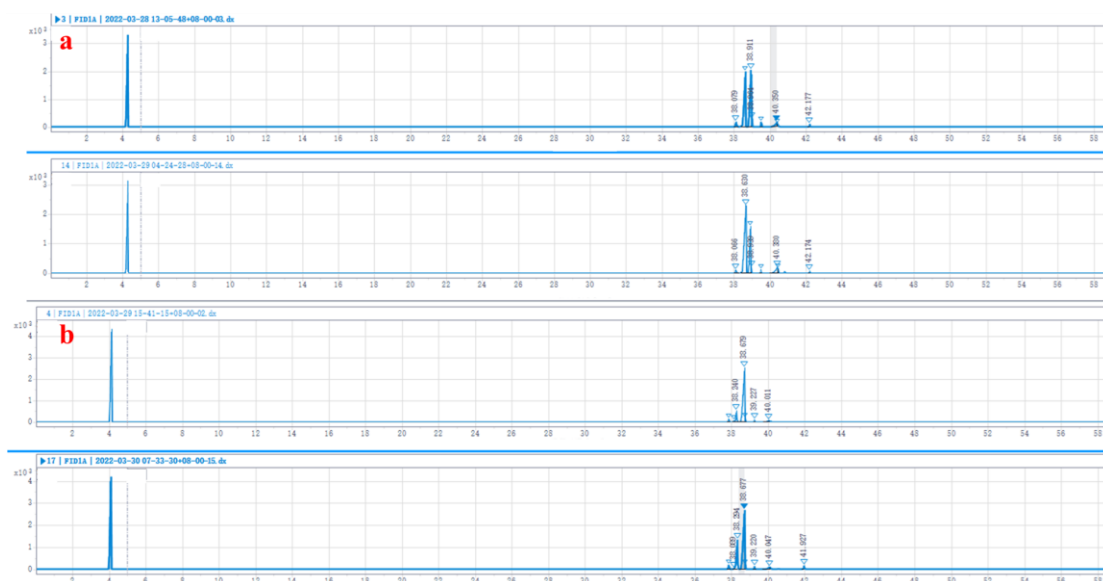

Fig. 5 Variation of component contents in the isomerization reaction of 3-MTHPA. a. Basic isomerization. b. Acid isomerization.

Based on 3/4-MTHPA, the acidic and basic isomerization of MTHPA was studied by  $^1\text{H-NMR}$ . The hydrogen shift of 4-MTHPA's main functional group can be clearly seen in SI Fig 6.a.  $\delta=5.45$  is the peak segment of  $-\text{C}=\text{C}-\text{H}$ ,  $\delta=1.76$  is the peak segment of  $-\text{CH}_3$ , and the coupled H peaks at other positions. SI Fig 6.b depicts the spectrum of 4-MTHPA after basic isomerization, and it is clear that the H shifts of several functional groups have changed.  $\delta=5.5, 5.6$  represents the peak segment of  $-\text{C}=\text{C}-\text{H}$ ,  $\delta=3.4\sim 3.7$  represents the peak segment of common  $-\text{C}-\text{C}-\text{H}$ , and  $\delta=1.8\sim 2.6$  represents the peak segment of  $-\text{CH}_2$ . After basic isomerization of 4-MTHPA, the change in H-shift demonstrated the emergence of new isomers.

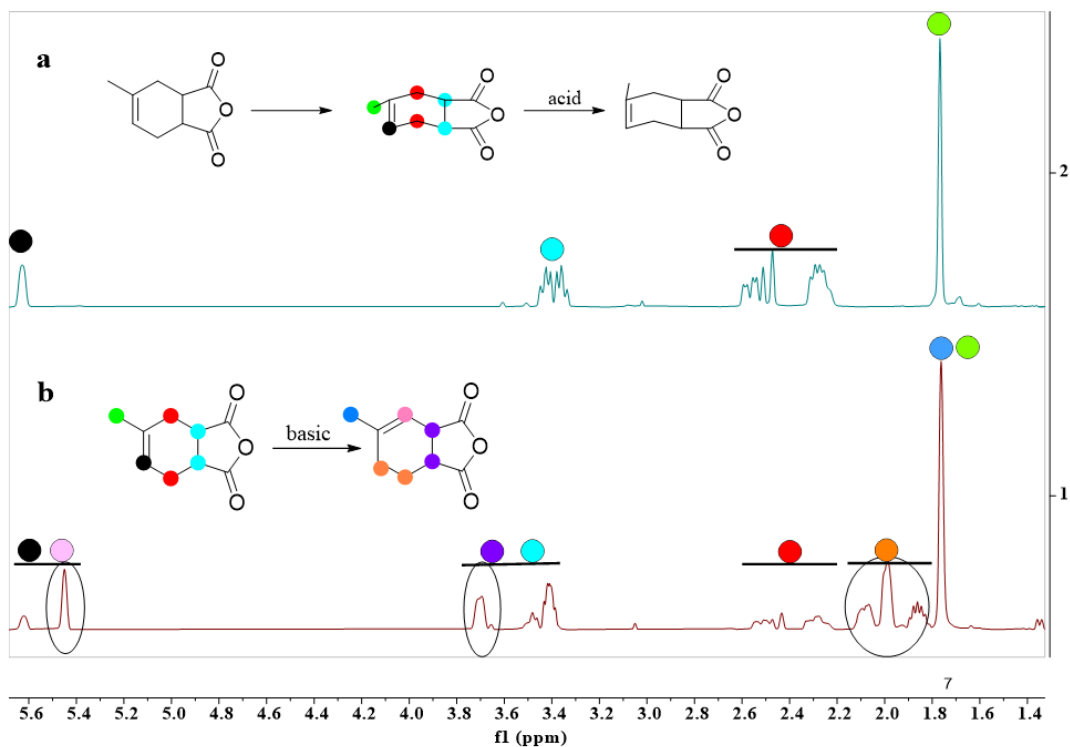

Fig 6. <sup>1</sup>H-NMR spectrum analysis. a. 4-MTHPA acid isomerization; b. 4-MTHPA basic isomerization.

SI Fig 7 depicts the <sup>1</sup>H-NMR of the acid isomerization reaction of 4-MTHPA at various temperatures, and it is discovered that the morphology of the spectrum does not change significantly. During the experiment, however, the acid isomerized product could be in a liquid state and stable at room temperature. It is possible that steric stereoisomerism modifies 4-MTHPA so that it is fluid at room temperature.

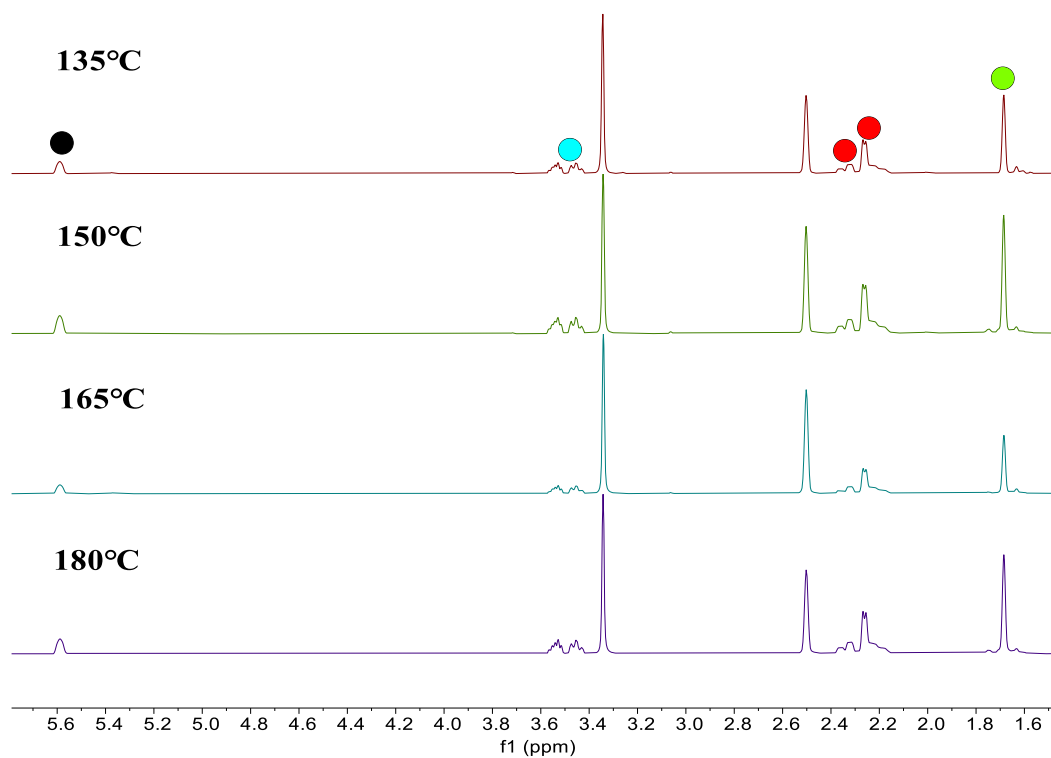

Fig 7. Basic and acid isomerization process of 4-MTHPA, and its acidic isomerization at different temperatures ( $T=135, 150, 165, 180^{\circ}\text{C}$ ) .

---

List 1. Anhydride value, viscosity, and density of 3-MTHPA basic isomerization products.

| Nodes | Anhydride value (%) | Viscosity (Pa/s) | Density (g/ml 25°C) |
|-------|---------------------|------------------|---------------------|
| 120°C | 40.96               | solid            | 1.118               |
| 135°C | 40.72               | solid            | 1.2035              |
| 150°C | 40.60               | 0.06290          | 1.2217              |
| 165°C | 41.20               | 0.07348          | 1.2266              |
| 180°C | 40.80               | 0.07744          | 1.2251              |
| 195°C | 41.11               | 0.07825          | 1.2231              |
| 1.0h  | 40.60               | 0.06290          | 1.2217              |
| 1.5h  | 41.41               | 0.07292          | 1.2177              |
| 2.0h  | 41.01               | 0.07898          | 1.2164              |
| 2.5h  | 41.14               | 0.07885          | 1.2075              |
| 3.0h  | 40.87               | 0.07865          | 1.2121              |
| 3.5h  | 41.23               | 0.07891          | 1.2153              |
| 2%    | 40.87               | 0.07865          | 1.2121              |
| 5%    | 41.18               | 0.08063          | 1.2092              |
| 10%   | 40.47               | 0.08168          | 1.2116              |
| 15%   | 40.39               | 0.09421          | 1.2066              |
| 20%   | 40.68               | 0.11598          | 1.2328              |
| 0.5%  | 41.19               | 0.08040          | 1.2207              |
| 1.0%  | 40.94               | 0.08128          | 1.2223              |
| 2.0%  | 40.96               | 0.08339          | 1.2322              |
| 3.0%  | 40.39               | 0.09421          | 1.2066              |
| 4.0%  | 40.70               | 0.10628          | 1.2535              |

---

---

4-MTHPA and its isomeric products were solid at room temperature.

List 2. Anhydride value, viscosity, and density of 4-MTHPA acid isomerization products.

| Nodes | Anhydride value (%) | Viscosity (Pa/s) | Density (g/ml 65°C) |
|-------|---------------------|------------------|---------------------|
| 120°C | 40.93               |                  | 1.1180              |
| 135°C | 41.11               |                  | 1.2035              |
| 150°C | 40.55               |                  | 1.2217              |
| 165°C | 40.40               |                  | 1.2566              |
| 180°C | 39.09               |                  | 1.2251              |
| 1.0h  | 40.40               | solid            | 1.2217              |
| 1.5h  | 40.62               |                  | 1.2177              |
| 2.0h  | 40.41               |                  | 1.2164              |
| 2.5h  | 39.04               |                  | 1.2075              |
| 3.0h  | 40.07               |                  | 1.2121              |
| 2%    | 39.36               |                  | 1.2121              |
| 5%    | 40.07               |                  | 1.2092              |
| 10%   | 40.77               | 0.08553          | 1.2116              |
| 15%   | 40.07               |                  | 1.2066              |
| 20%   | 39.89               |                  | 1.2328              |
| 0.5%  | 39.50               |                  | 1.2207              |
| 1.0%  | 40.19               |                  | 1.2223              |
| 2.0%  | 40.32               |                  | 1.2322              |
| 3.0%  | 39.36               |                  | 1.2066              |
| 4.0%  | 40.35               |                  | 1.2535              |



---

List 3. The viscosity of 3/4-MTHPA with different ratios

---

| 3/4- MTHPA ratio | Viscosity/basic (Pa/s) | Viscosity/acid (Pa/s) |
|------------------|------------------------|-----------------------|
| 3:4=1:0          | solid                  |                       |
| 3:4=1:1          | 0.06842                | 0.06040               |
| 3:4=1:1.5        | 0.06875                | 0.06090               |
| 3:4=1:2          | 0.07180                | 0.06180               |
| 3:4=2:1          | 0.06500                | 0.05810               |
| 3:4=1.5:1        | 0.04640                | 0.04290               |
| 3:4=1:0          | solid                  |                       |

---
